# Supplementary material
Source: PubMed Central journal article supplement (PMC2772550)

# Supplementary Figure 1

## Neisseria interactions with T cells

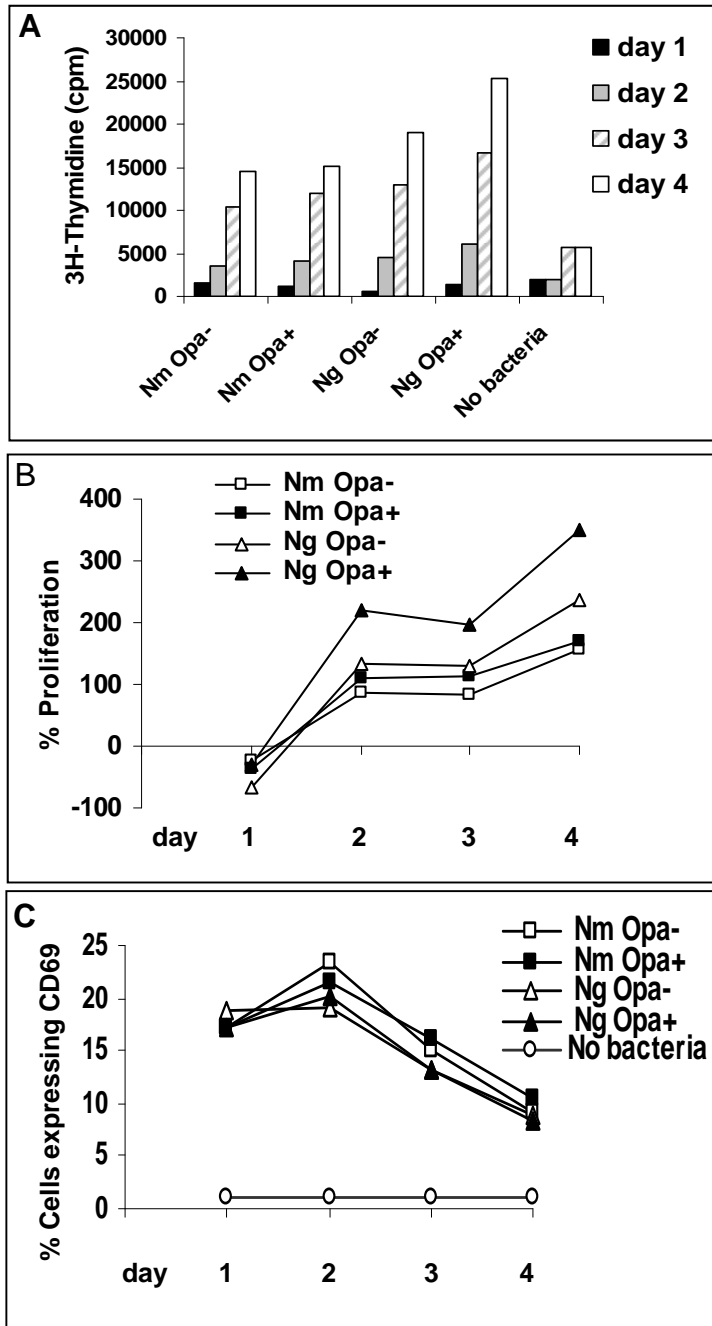

## Supplementary Figure 2 Neisseria interactions with T cells

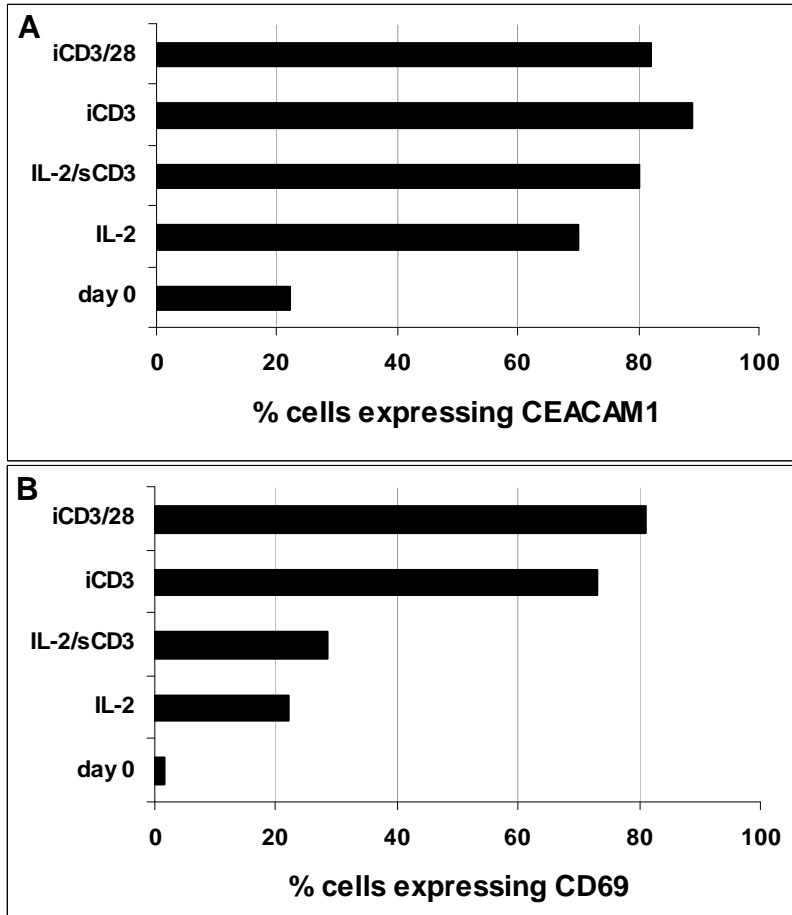

### Supplementary Figure 3 Neisseria interactions with T cells

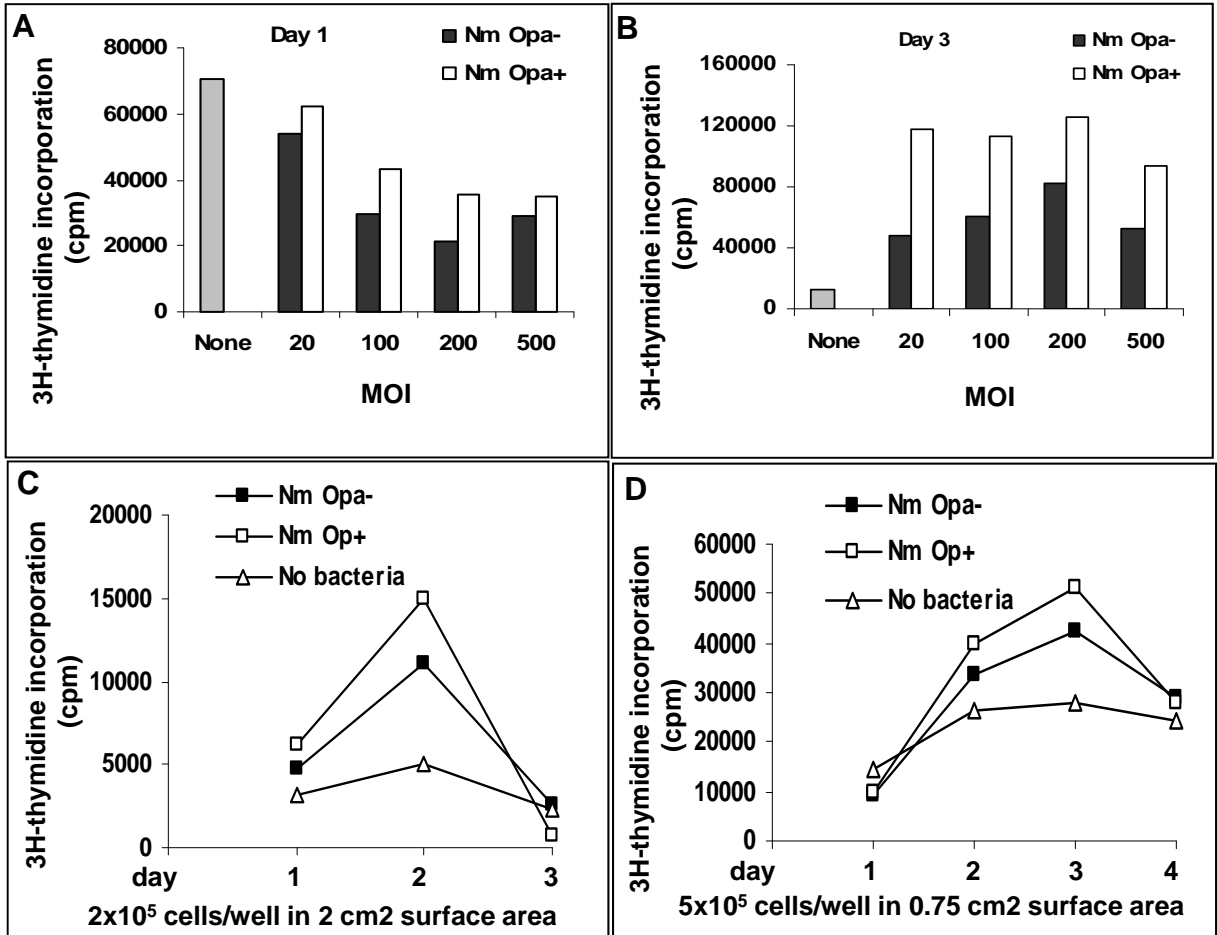

## Supplementary Figure 4 Neisseria interactions with T cells

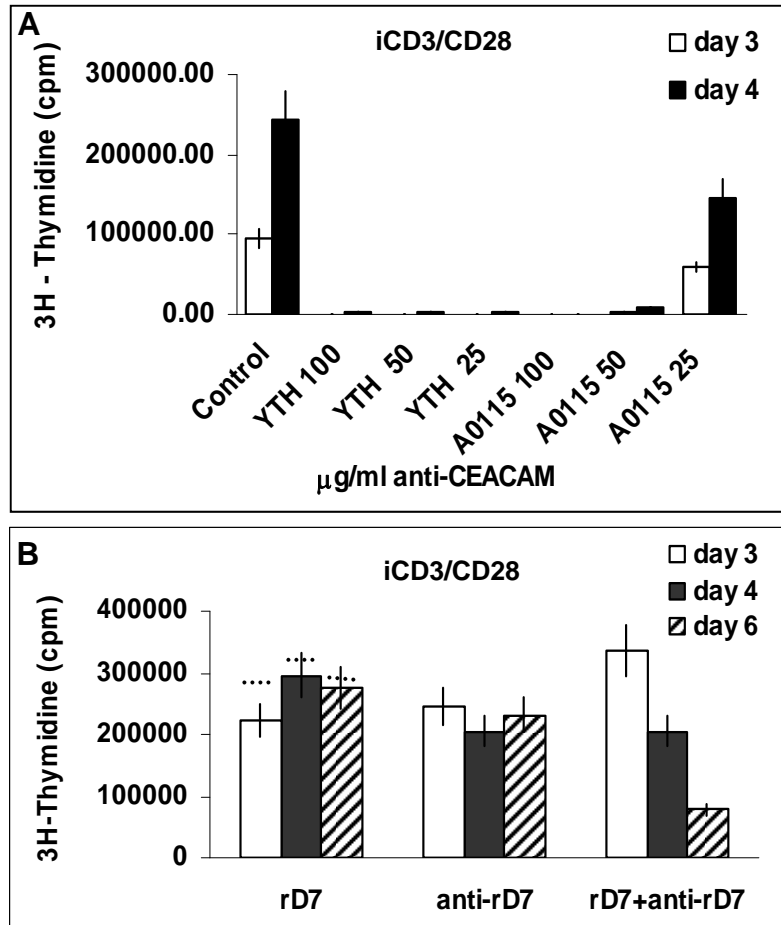

Supplement: supp_77_11_5170__1.pdf [file supp_77_11_5170__1.pdf]
